# Supplementary material for: Phase II clinical and immune correlate study of adjuvant nivolumab plus ipilimumab for high-risk resected melanoma
Source: PubMed Central journal article supplement — J Immunother Cancer. 2022 Nov 30;10(11):e005684. doi: 10.1136/jitc-2022-005684 (PMC9717375; doi:10.1136/jitc-2022-005684), 2022-11-30
Supplement: jitc-2022-005684supp005.pdf [file jitc-2022-005684supp005.pdf]

| Cohort | Patient Number | Sex | Age (at start of trial) | Outcome | Baseline Flow Data | On-Treatment Flow Data | RNA-Seq |
|--------|----------------|-----|-------------------------|---------|--------------------|------------------------|---------|
| 4      | 39             | M   | 43                      | NED     | No                 | No                     | No      |
| 4      | 40             | M   | 71                      | NED     | No                 | No                     | No      |
| 4      | 41             | M   | 49                      | Relapse | No                 | No                     | No      |
| 4      | 42             | M   | 69                      | NED     | No                 | No                     | No      |
| 4      | 43             | M   | 32                      | NED     | No                 | No                     | No      |
| 4      | 44             | M   | 69                      | NED     | No                 | No                     | No      |
| 4      | 45             | M   | 26                      | NED     | No                 | No                     | No      |
| 4      | 46             | F   | 56                      | NED     | No                 | No                     | No      |
| 4      | 47             | F   | 53                      | NED     | No                 | No                     | No      |
| 4      | 48             | M   | 46                      | NED     | No                 | No                     | No      |
| 4      | 49             | M   | 31                      | Relapse | Yes                | Yes                    | Yes     |
| 4      | 50             | M   | 74                      | Relapse | Yes                | Yes                    | No      |
| 4      | 51             | F   | 44                      | NED     | Yes                | Yes                    | Yes     |
| 4      | 52             | M   | 62                      | NED     | No                 | No                     | No      |
| 4      | 53             | M   | 65                      | Relapse | No                 | No                     | No      |
| 4      | 54             | F   | 60                      | NED     | Yes                | Yes                    | Yes     |
| 4      | 55             | M   | 36                      | NED     | No                 | No                     | No      |
| 4      | 56             | F   | 49                      | Relapse | Yes                | No                     | No      |
| 4      | 57             | M   | 78                      | NED     | No                 | No                     | No      |
| 4      | 58             | M   | 23                      | Relapse | No                 | No                     | No      |
| 5      | 59             | M   | 72                      | NED     | No                 | No                     | No      |
| 5      | 60             | F   | 43                      | NED     | No                 | No                     | No      |
| 5      | 61             | M   | 38                      | Relapse | Yes                | No                     | No      |
| 5      | 62             | M   | 46                      | NED     | No                 | No                     | No      |
| 5      | 63             |     |                         | NED     | No                 | No                     | No      |
| 5      | 64             | M   | 62                      | NED     | No                 | No                     | No      |
| 5      | 65             | M   | 59                      | Relapse | No                 | No                     | No      |
| 5      | 66             | M   | 62                      | NED     | No                 | No                     | No      |
| 5      | 67             | M   | 54                      | Relapse | No                 | No                     | No      |
| 5      | 69             | F   | 54                      | Relapse | Yes                | Yes                    | Yes     |
| 5      | 70             | M   | 44                      | NED     | No                 | No                     | No      |
| 5      | 71             | F   | 57                      | NED     | No                 | No                     | No      |
| 5      | 72             | M   | 58                      | NED     | No                 | No                     | No      |
| 5      | 73             | M   | 30                      | Relapse | Yes                | Yes                    | Yes     |
| 5      | 74             | F   | 52                      | NED     | No                 | No                     | No      |
| 5      | 75             | M   | 46                      | NED     | No                 | No                     | No      |
| 5      | 76             |     |                         | NED     | No                 | No                     | No      |
| 5      | 77             | M   | 77                      | NED     | No                 | No                     | No      |
| 5      | 78             | F   | 32                      | Relapse | Yes                | Yes                    | No      |
| 5      | 79             | F   | 61                      | NED     | No                 | No                     | No      |
| 5      | 80             | F   | 63                      | NED     | No                 | No                     | No      |
| 6      | 1              | F   | 49                      | NED     | No                 | No                     | No      |
| 6      | 2              | M   | 42                      | NED     | No                 | No                     | No      |
| 6      | 3              | M   | 43                      | NED     | Yes                | Yes                    | No      |
| 6      | 4              | M   | 22                      | NED     | Yes                | Yes                    | No      |
| 6      | 5              | F   | 39                      | NED     | Yes                | Yes                    | No      |
| 6      | 6              | M   | 68                      | Relapse | No                 | No                     | No      |
| 6      | 7              | F   | 52                      | NED     | Yes                | Yes                    | No      |
| 6      | 8              | M   | 70                      | Relapse | Yes                | Yes                    | Yes     |
| 6      | 9              | M   | 61                      | NED     | No                 | No                     | No      |
| 6      | 10             | M   | 80                      | NED     | No                 | No                     | No      |
| 6      | 11             | M   | 72                      | NED     | Yes                | Yes                    | Yes     |
| 6      | 12             | M   | 73                      | NED     | Yes                | Yes                    | Yes     |
| 6      | 13             | M   | 60                      | Relapse | No                 | No                     | No      |
| 6      | 14             | M   | 61                      | NED     | No                 | No                     | No      |
| 6      | 15             | M   | 53                      | NED     | Yes                | Yes                    | No      |
| 6      | 16             | M   | 59                      | Relapse | Yes                | Yes                    | Yes     |
| 6      | 17             | M   | 83                      | NED     | Yes                | Yes                    | Yes     |
| 6      | 18             | M   | 61                      | NED     | Yes                | Yes                    | No      |
