# Supplementary material for: Phase II clinical and immune correlate study of adjuvant nivolumab plus ipilimumab for high-risk resected melanoma
Source: PubMed Central journal article supplement — J Immunother Cancer. 2022 Nov 30;10(11):e005684. doi: 10.1136/jitc-2022-005684 (PMC9717375; doi:10.1136/jitc-2022-005684), 2022-11-30
Supplement: jitc-2022-005684supp006.pdf [file jitc-2022-005684supp006.pdf]

| <b>Marker</b> | <b>Fluorochrome</b> | <b>Clone</b>    | <b>Vendor</b> | <b>Catalogue Number</b> |
|---------------|---------------------|-----------------|---------------|-------------------------|
| CD127         | AF700               | eBioRDR5        | eBioscience   | 56-1278-42              |
| CD25          | BV605               | 2A3             | BDBiosciences | 562660                  |
| CD3           | BV786               | UCHT1           | BDBiosciences | 565491                  |
| CD3           | BV786               | UCHT1           | 565491        | BDBiosciences           |
| CD38          | PE                  | HB7             | eBioscience   | 12-0388-42              |
| CD39          | FITC                | TU66            | BDBiosciences | 561444                  |
| CD4           | APC                 | RPA-T4          | BDBiosciences | 555349                  |
| CD4           | BUV395              | RPA-T4          | BDBiosciences | 564724                  |
| CD8           | PE-CY5              | HIT8a           | BDBiosciences | 555636                  |
| CD8           | BUV805              | HIT-8a          | BDBiosciences | 742030                  |
| FOXP3         | PE-CF594            | 259D/C7         | BDBiosciences | 562421                  |
| GARP          | BV421               | 7B11            | BDBiosciences | 563956                  |
| pSTAT1 (S727) | AF647               | A15158B         | Biologend     | 686412                  |
| pSTAT1 (Y701) | BV421               | 4a              | BDBiosciences | 562985                  |
| pSTAT2 (Y689) | AF700               | 1021D           | R&D Systems   | IC2890N-100UG           |
| pSTAT3 (S727) | PE                  | 49/p-Stat3      | BDBiosciences | 558557                  |
| pSTAT3 (Y705) | PE-CF594            | 4/P-STAT3       | BDBiosciences | 562673                  |
| pSTAT4 (Y693) | AF488               | 38/p-Stat4      | BDBiosciences | 558136                  |
| pSTAT5 (Y694) | PE-CY7              | 47/Stat5(pY694) | BDBiosciences | 560117                  |
| pSTAT6 (Y641) | PerCP-CY5.5         | 18/P-Stat6      | BDBiosciences | 561195                  |
