# Supplementary figures and images for: Phase II clinical and immune correlate study of adjuvant nivolumab plus ipilimumab for high-risk resected melanoma
Source: PubMed Central journal article supplement — J Immunother Cancer. 2022 Nov 30;10(11):e005684. doi: 10.1136/jitc-2022-005684 (PMC9717375; doi:10.1136/jitc-2022-005684), 2022-11-30

Supplementary Figure 1:

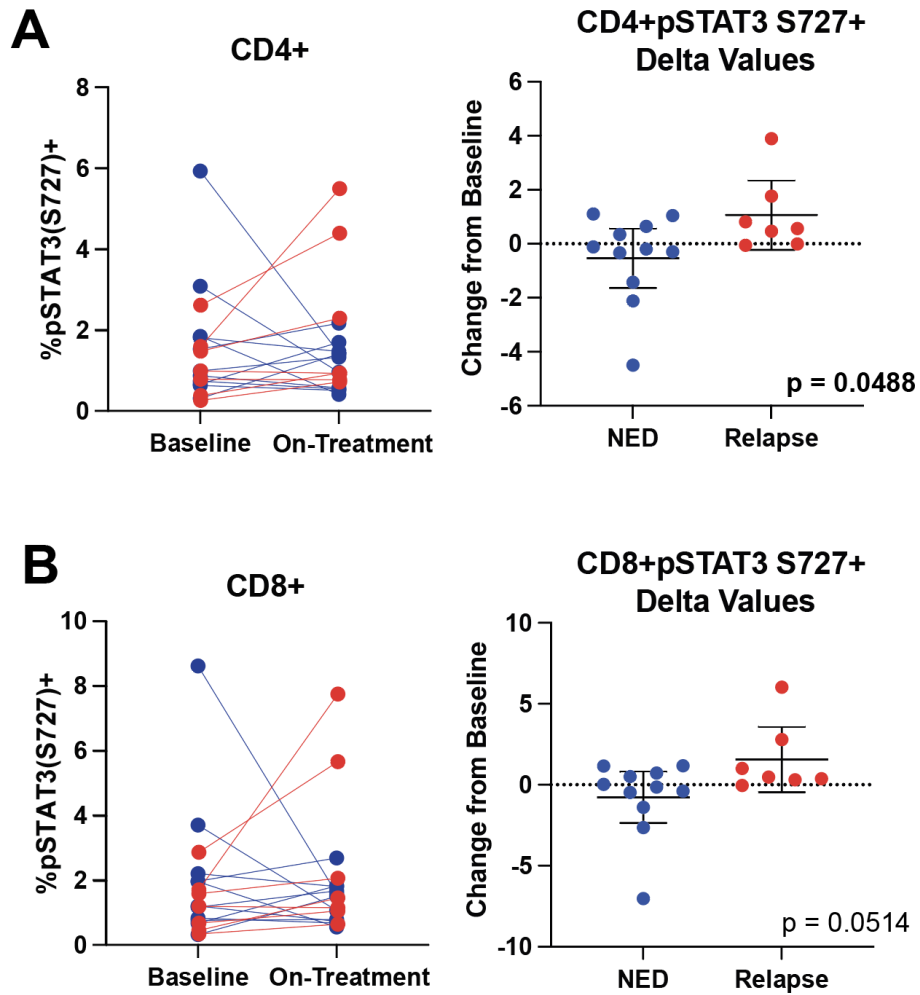

Supplement: jitc-2022-005684supp001.pdf [file jitc-2022-005684supp001.pdf]

Supplemental Figure 2:

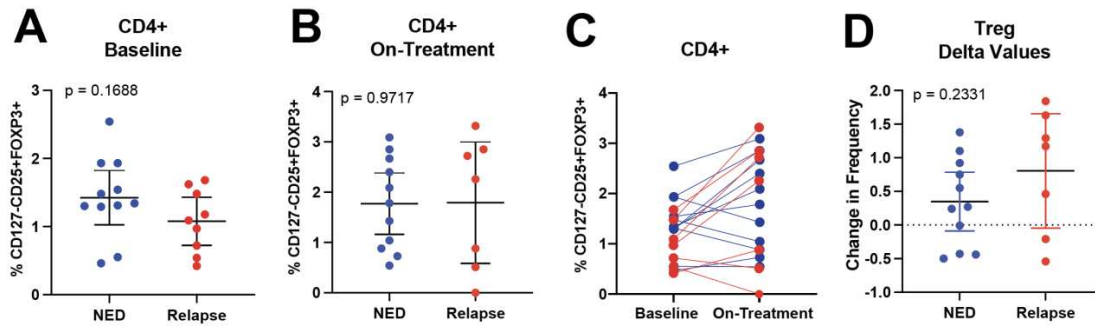

Supplement: jitc-2022-005684supp002.pdf [file jitc-2022-005684supp002.pdf]

## Supplementary Figure 3:

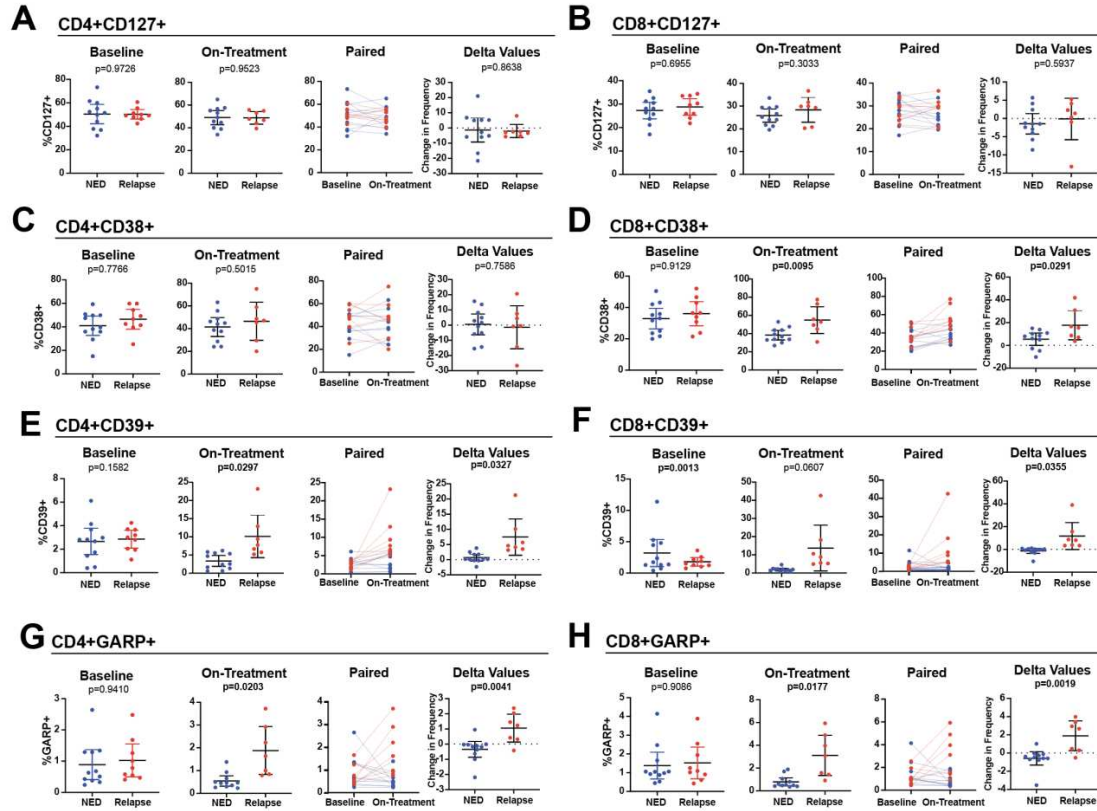

Supplement: jitc-2022-005684supp003.pdf [file jitc-2022-005684supp003.pdf]

**Supplementary Figure 4:**

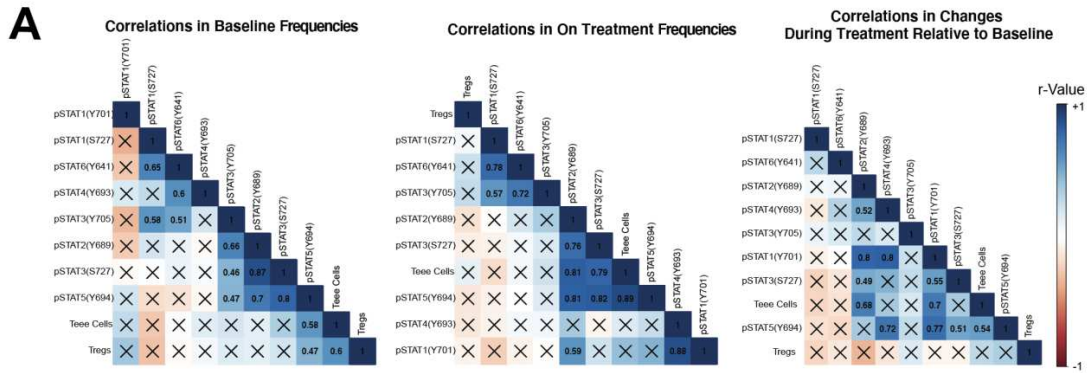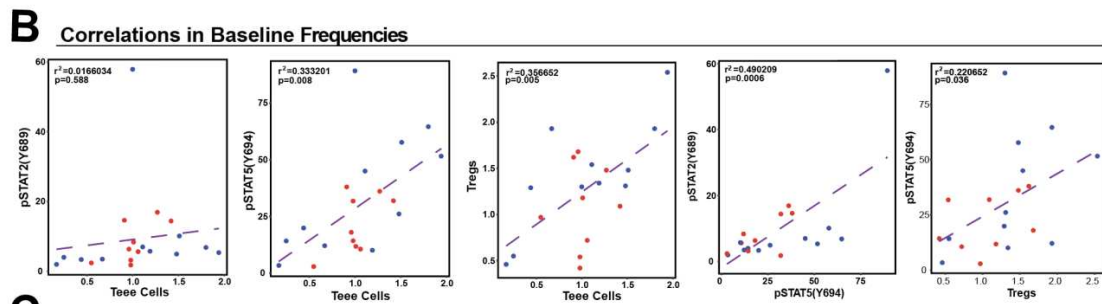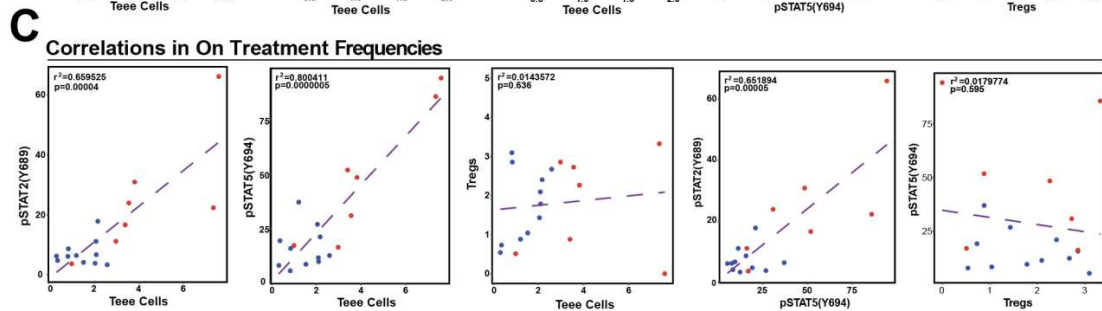

Supplement: jitc-2022-005684supp004.pdf [file jitc-2022-005684supp004.pdf]
